# Supplementary figures and images for: Transforming Boolean models to continuous models: methodology and application to T-cell receptor signaling
Source: Springer Nature journal article supplement (doi:10.1186/1752-0509-3-98), 2009-09-28

high

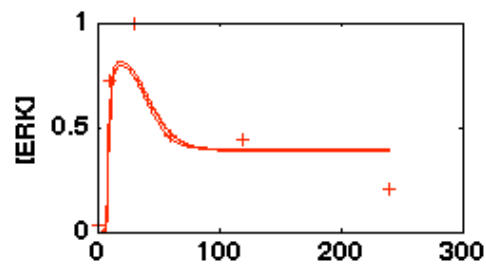

medium

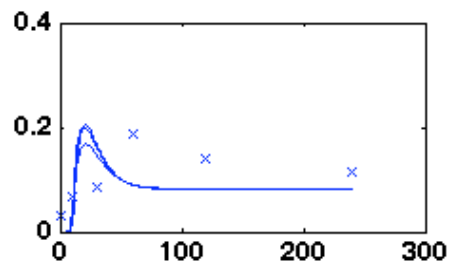

low

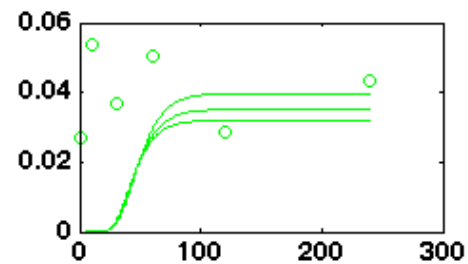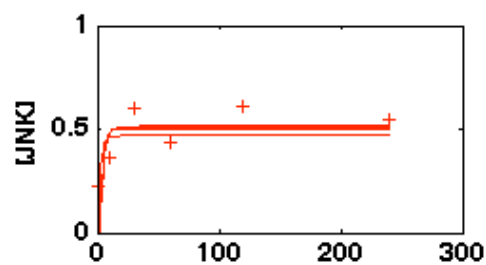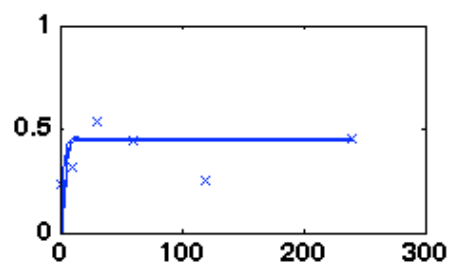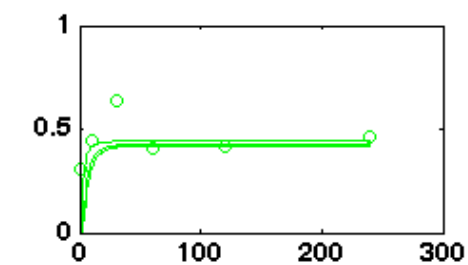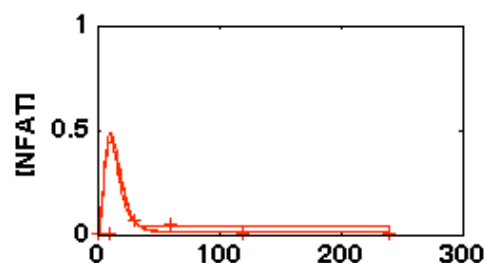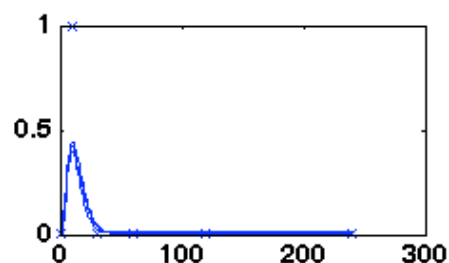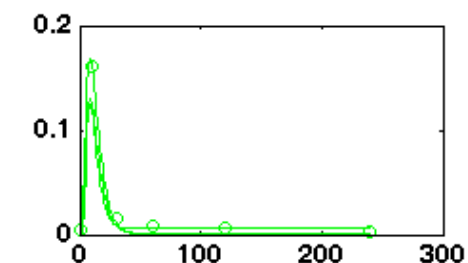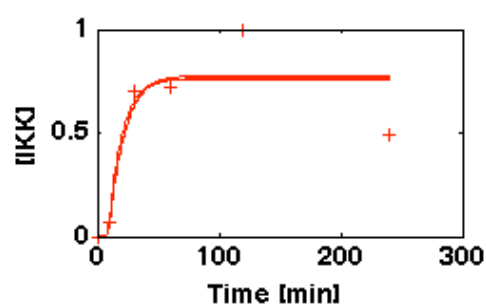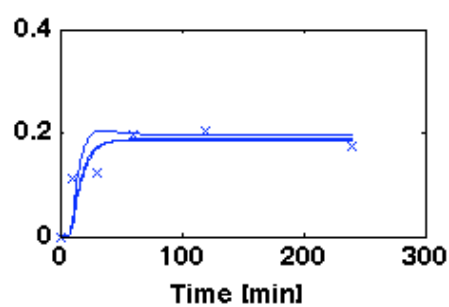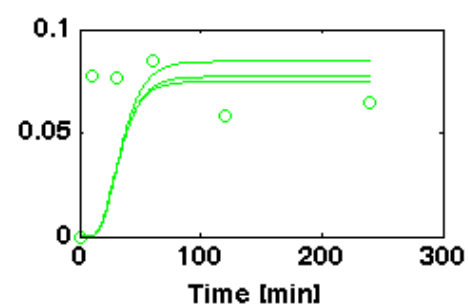

Supplement: Additional file 6 [file 1752-0509-3-98-s6.pdf]
